# Supplementary material for: Sensitivity analysis of planetary boundary layer parameterization on meteorological simulations in the Yangtze river delta region, China
Source: Royal Society of Chemistry journal article supplement (doi:10.1039/d4ea00038b), 2024-01-01
Supplement: d4ea00038b1.pdf [file d4ea00038b1.pdf]

## *Supplement of*

# **Sensitivity Analysis of Planetary Boundary Layer Parameterization on Meteorological Simulations in the Yangtze River Delta Region, China**

*Dihui Chen, et al.*

Correspondence: Li Li ([Lily@shu.edu.cn](mailto:Lily@shu.edu.cn)); ANDY CHAN TAK YEE  
<[atchan4@icloud.com](mailto:atchan4@icloud.com)>

**Fig. S1** Time series of observed and model predicted air temperature (a), wind speed (b), and relative humidity (c) over the YRD region during July, 2018; the yellow area represents the range of maximum and minimum observations, same as below.

**Fig. S2** Time series of observed and model predicted air temperature (a), wind speed (b), and relative humidity (c) over YRD region during November, 2018.

**Table S1** Locations and surface land use type of the 41 meteorological stations.

**Table S2** Daily minimum PBLH modeled with four schemes in summer and winter of 2018.

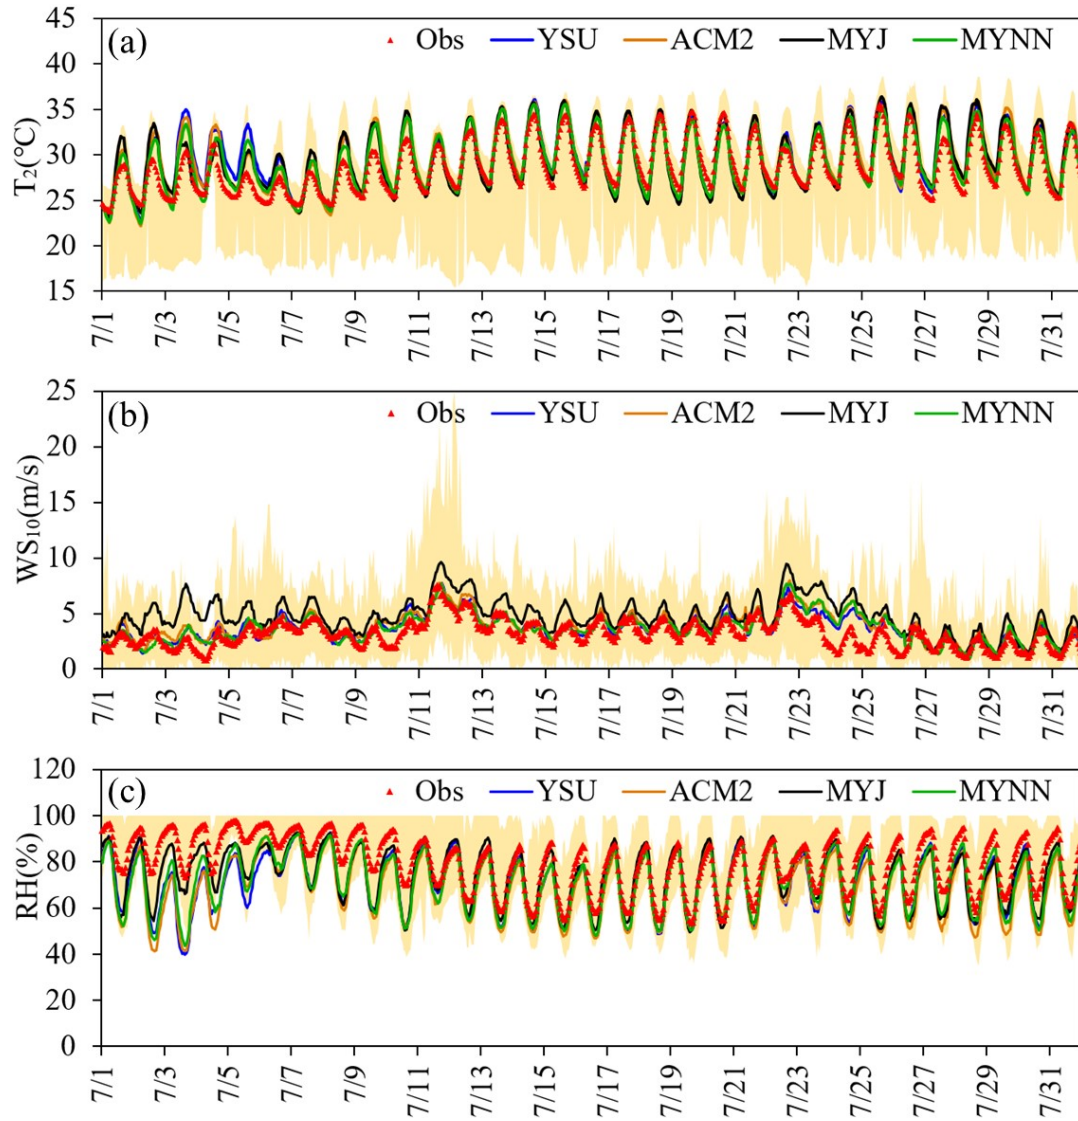

**Fig. S1** Time series of observed and model predicted air temperature (a), wind speed (b), and relative humidity (c) over the YRD region during July, 2018; the yellow area represents the range of maximum and minimum observations, same as below.

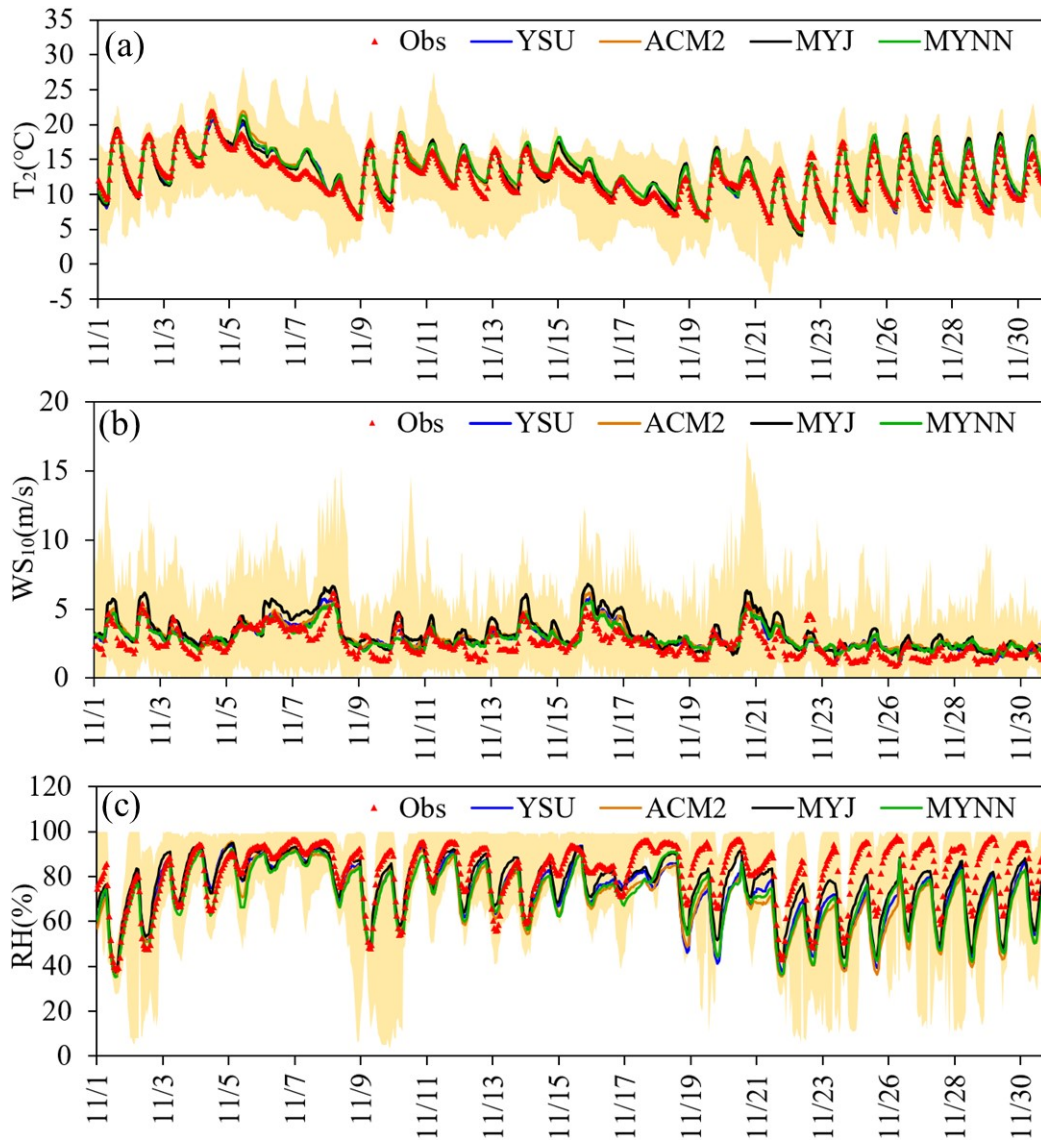

**Fig. S2** Time series of observed and model predicted air temperature (a), wind speed (b), and relative humidity (c) over YRD region during November, 2018.

**Table S1** Locations and surface land use type of the 41 meteorological stations.

| Province/City | Station     | Latitude | Longitude | Surface Land use Class |
|---------------|-------------|----------|-----------|------------------------|
| Anhui         | Bozhou      | 33.867   | 115.767   | Urban                  |
|               | Huaipei     | 33.983   | 116.083   | Cropland               |
|               | Suzhou      | 33.633   | 116.983   | Urban                  |
|               | Fuyang      | 32.867   | 115.733   | Urban                  |
|               | Bengbu      | 32.85    | 117.3     | Cropland               |
|               | Huainan     | 32.65    | 117.017   | Urban                  |
|               | Chuzhou     | 32.35    | 118.25    | Cropland               |
|               | Luan        | 31.733   | 116.05    | Forest                 |
|               | Hefei       | 31.783   | 117.3     | Urban                  |
|               | Wuhu        | 31.383   | 118.367   | Urban                  |
|               | Tongling    | 30.983   | 117.85    | Urban                  |
|               | Xuancheng   | 30.933   | 118.75    | Cropland               |
|               | Huangshan   | 30.133   | 118.15    | Forest                 |
|               | Maanshan    | 31.567   | 118.517   | Cropland               |
|               | Chizhou     | 30.28    | 117.48    | Cropland               |
|               | Anqing      | 31.067   | 116.95    | Cropland               |
|               | Xuzhou      | 34.283   | 117.15    | Urban                  |
|               | Lianyungang | 34.533   | 119.233   | Cropland               |
|               | Huainan     | 33.633   | 118.933   | Cropland               |
|               | Jiangsu     | Nanjing  | 31.933    | 118.9                  |
| Yancheng      |             | 33.433   | 120.2     | Urban                  |
| Yangzhou      |             | 32.417   | 119.417   | Cropland               |
| Taizhou       |             | 32.55    | 120       | Cropland               |
| Dantu         |             | 32.183   | 119.467   | Urban                  |
| Nantong       |             | 32.083   | 120.983   | Cropland               |
| Suzhou        |             | 31.417   | 120.567   | Urban                  |
| Wuxi          |             | 31.617   | 120.35    | Urban                  |
| Changzhou     |             | 31.433   | 119.483   | Urban                  |
| Suqian        |             | 33.717   | 118.683   | Urban                  |
| Shanghai      | Shanghai    | 31.4     | 121.45    | Urban                  |
|               | Huzhou      | 30.867   | 120.05    | Cropland               |
|               | Jiaxing     | 30.733   | 120.767   | Urban                  |
| Zhejiang      | Shaoxing    | 30.067   | 120.05    | Forest                 |
|               | Hangzhou    | 30.233   | 120.017   | Urban                  |
|               | Zhoushan    | 30.033   | 122.1     | Forest                 |
|               | Quzhou      | 29.033   | 119.183   | Urban                  |
|               | Jinhua      | 29.117   | 119.65    | Urban                  |
|               | Ningbo      | 29.783   | 121.55    | Cropland               |
|               | Lishui      | 28.45    | 119.917   | Urban                  |
|               | Taizhou     | 28.867   | 121.2     | Cropland               |
|               | Wenzhou     | 28.067   | 120.967   | Forest                 |

**Table S2** Daily minimum PBLH modeled at Fuyang site with four schemes in

summer and winter of 2018.

|        | ACM2 | YSU | MYJ | MYNN |        | ACM2 | YSU | MYJ | MYNN |
|--------|------|-----|-----|------|--------|------|-----|-----|------|
| 1-Jul  | 31   | 26  | 21  | 37   | 1-Nov  | 51   | 145 | 40  | 52   |
| 2-Jul  | 48   | 19  | 21  | 29   | 2-Nov  | 73   | 84  | 88  | 53   |
| 3-Jul  | 32   | 18  | 22  | 24   | 3-Nov  | 38   | 94  | 20  | 23   |
| 4-Jul  | 32   | 17  | 21  | 41   | 4-Nov  | 31   | 10  | 20  | 32   |
| 5-Jul  | 32   | 12  | 21  | 139  | 5-Nov  | 76   | 45  | 20  | 49   |
| 6-Jul  | 264  | 107 | 121 | 317  | 6-Nov  | 223  | 144 | 682 | 463  |
| 7-Jul  | 93   | 56  | 148 | 198  | 7-Nov  | 208  | 149 | 390 | 463  |
| 8-Jul  | 32   | 11  | 21  | 34   | 8-Nov  | 33   | 53  | 19  | 32   |
| 9-Jul  | 32   | 33  | 21  | 44   | 9-Nov  | 30   | 46  | 20  | 23   |
| 10-Jul | 101  | 42  | 21  | 122  | 10-Nov | 71   | 13  | 20  | 31   |
| 11-Jul | 385  | 334 | 427 | 345  | 11-Nov | 30   | 10  | 20  | 26   |
| 12-Jul | 37   | 114 | 21  | 36   | 12-Nov | 42   | 57  | 20  | 42   |
| 13-Jul | 32   | 133 | 21  | 52   | 13-Nov | 33   | 71  | 20  | 73   |
| 14-Jul | 32   | 148 | 22  | 44   | 14-Nov | 117  | 85  | 163 | 230  |
| 15-Jul | 53   | 11  | 97  | 38   | 15-Nov | 129  | 124 | 20  | 300  |
| 16-Jul | 47   | 13  | 21  | 36   | 16-Nov | 294  | 205 | 397 | 382  |
| 17-Jul | 40   | 15  | 21  | 27   | 17-Nov | 30   | 19  | 19  | 304  |
| 18-Jul | 72   | 29  | 21  | 92   | 18-Nov | 30   | 10  | 19  | 24   |
| 19-Jul | 99   | 204 | 22  | 69   | 19-Nov | 29   | 10  | 19  | 24   |
| 20-Jul | 150  | 205 | 209 | 107  | 20-Nov | 29   | 10  | 20  | 23   |
| 21-Jul | 94   | 135 | 21  | 61   | 21-Nov | 29   | 10  | 19  | 31   |
| 22-Jul | 189  | 191 | 21  | 299  | 22-Nov | 30   | 30  | 19  | 24   |
| 23-Jul | 32   | 12  | 21  | 37   | 23-Nov | 29   | 13  | 19  | 25   |
| 24-Jul | 60   | 18  | 21  | 126  | 24-Nov | 29   | 15  | 19  | 25   |
| 25-Jul | 88   | 40  | 21  | 27   | 25-Nov | 29   | 10  | 20  | 29   |
| 26-Jul | 86   | 29  | 21  | 54   | 26-Nov | 30   | 10  | 19  | 24   |
| 27-Jul | 32   | 14  | 21  | 34   | 27-Nov | 29   | 10  | 20  | 38   |
| 28-Jul | 32   | 11  | 22  | 34   | 28-Nov | 30   | 12  | 20  | 23   |
| 29-Jul | 32   | 11  | 21  | 29   | 29-Nov | 30   | 10  | 20  | 27   |
| 30-Jul | 32   | 11  | 21  | 31   | 30-Nov | 30   | 16  | 20  | 40   |
| 31-Jul | 32   | 11  | 21  | 36   |        |      |     |     |      |
